# Supplementary material
Source: publisher figshare collection journal article supplement (https://future-science-group.figshare.com/ndownloader/files/34994866)
Supplement: Supplementary file 1 [file 34994866]

## Sheet: BOTH (nIsland=21)
CpG Island number	Location	Mean.meth.diff	Adjusted_pvalue	Genes (transcript or OMIM ID)	Gene product	Highest gene expression (GTEx)	Associated inherited disorder?	Comments
168	chr1:2082315-2082529	-0.152704	0.0452883	PRKCZ (MIM 176982)	Protein-coding	Brain	NO
2316	chr1:228658938-228659152	-0.256677	0.00147171	-	-	-	NO
2450	chr1:247681400-247681951	-0.233258	0.0102418	GCSAML	Protein-coding	Brain	NO
3441	chr2:132404285-132404960	-0.232864	0.0126586	GRAMD4P8 (ENST00000605465)	Processed pseudogene	Testis	NO	overlapping with DYT-KMT2B cohort
				LINC01087 (ENST00000431979)	IncRNA	Testis	NO
3931	chr2:232348217-232348866	-0.227948	0.000638542	NCL (MIM 164035) *Regulated	Protein-coding	Lymphocytes and others	NO	overlapping with KS1 cohort
4392	chr3:42977831-42978090	-0.17075	0.0409648	KRBOX1	Protein-coding	Testis	NO
				KRBOX1-AS1	antisense-RNA	Testis	NO
4675	chr3:72978000-72978325	-0.123769	0.0102418	GXYLT2 (MIM 613322)	Protein-coding	Ovary, artery	NO
				FTH1P23	Processed pseudogene	Nerve, blood	NO
5240	chr3:194014481-194014983	-0.199195	0.0409648	LINC00887	IncRNA	Adrenal gland	NO
9449	chr7:47092245-47093076	-0.227244	0.0409648	AC004870.3 (ENST00000455078)	IncRNA	Testis	NO	overlapping with DYT-KMT2B cohort
9691	chr7:75779629-75780022	-0.253915	0.0100465	-	-	-	NO	overlapping with DYT-KMT2B cohort
13042	chr10:51784595-51784810	-0.218169	0.000377945	RP11-324H6.5 (FAM21EP in hg38) (ENST00000417804) *Regulated	Processed pseudogene	Heart	NO	overlapping with DYT-KMT2B cohort
14884	chr11:89786603-89786956	-0.191021	0.0126586	RP11-592A4.12 (NST00000530158)	Unprocessed pseudogene	Pituitary, testis, Brain	NO	overlapping with DYT-KMT2B cohort
				TRIM49C	Protein-coding	Testis	NO
17602	chr14:101908782-101909022	0.0946629	0.0304277	RP11-168L7.3 (LINC02314 in hg38)	IncRNA	Testis	NO
17852	chr15:27138902-27139653	-0.303692	0.0183421	GABRA5 (MIM 137142)	Protein-coding	Brain	Developmental and epileptic encephalopathy 79 (*AR, MIM 618559)
				GABRB3 (MIM 137192)	Protein-coding	Brain	Developmental and epileptic encephalopathy 43 (*AR, MIM 617113) Epilepsy, childhood absence, susceptibility to, 5 (Unknown, MIM 612269)
20206	chr17:3907379-3907703	-0.165082	0.0409648	ZZEF1 (MIM 619459) *Regulated	Protein-coding	Small intestine and others	NO
20439	chr17:17603584-17604147	-0.187887	0.0164663	RAI1 (MIM 607642)	Protein-coding	Cervix and others	Smith-Magenis syndrome (*AR, MIM 182290) Potocki-Lupski syndrome (*AD, MIM 610883)
23720	chr19:36484905-36485476	-0.293013	0.000638542	SDHAF1 (MIM 612848) *Regulated	Protein-coding	Brain and others	Mitochondrial complex II deficiency, nuclear type 2 and Leigh syndrome (*AR, MIM 619166)	overlapping with DYT-KMT2B cohort
24187	chr19:47507307-47507692	-0.160829	0.0409648	ARHGAP35 (MIM 605277)	Protein-coding	Testis, brain and others	ARHGAP35-related developmental disorder (Monoallelic, *DD)
25162	chr20:43932913-43933400	-0.239833	0.0452883	MATN4 (MIM 603897)	Protein-coding	Brain and others	NO	overlapping with DYT-KMT2B cohort
25197	chr20:44829507-44829848	-0.183588	0.0409648	CDH22 (MIM 609920)	Protein-coding	Brain	NO
25527	chr20:62569798-62570776	-0.238742	0.000146683	UCKL1 (MIM 610866) *Regulated	Protein-coding	Brain and others	NO	overlapping with DYT-KMT2B cohort

## Sheet: DYT-KMT2B(nIsland=40)
CpG Island number	Location	Mean.meth.diff	Adjusted_pvalue	Genes (transcript or OMIM ID)	Gene product	Highest gene expression (GTEx)	Associated inherited disorder?
1372	chr1:106623394-106623854	-0.248368	0.0404738	RP5-947P14.1 (ENST00000437803)	IncRNA	Brain, testis	NO
				RP5-947P14.2 (ENST00000429608)	IncRNA	Testis, brain	NO
1545	chr1:145713967-145714203)	-0.253875	0.0476045	CD160 (MIM 604463)	Protein-coding	Spleen	NO
1595	chr1:147826168-147826388	-0.382987	2.93129e-05	NBPF10 (NBPF8 in hg38) (MIM 613998)	Protein-coding	Brain, thyroid and others	NO
				LINC01138 (or FLJ39739) (ENST00000381475) *Regulated	IncRNA	Brain and others	NO
2430	chr1:245851178 -245852514	-0.259513	0.0476045	KIF26B (MIM 614026)	Protein-coding	Brain	NO
3067	chr2:87036601-87037001	-0.297453	0.0427395	RMND5A (MIM 618964)	Protein-coding	Brain, blood and others	NO
				CD8A (MIM 186910) *Regulated	Protein-coding	Spleen, blood	CD8 deficiency, familial (*AR, MIM 608957)
3388	chr2:129659682-129659947	-0.293183	0.0307341	-	-	-	NO
3441	chr2:132404285-132404960	-0.367447	0.00875403	GRAMD4P8 (ENST00000605465)	Processed pseudogene	Testis	NO
				LINC01087 (ENST00000431979)	IncRNA	Testis	NO
4760	chr3:113160300-113160641	-0.278949	0.0121162	CFAP44 (MIM 617559)	Protein-coding	Pituitary	Spermatogenic failure 20 (*AR, MIM 617593)
6625	chr5:41509784-41510166	-0.206212	0.0304947	PLCXD3 (MIM 617016)	Protein-coding	Brain, ovary and heart	NO
7814	chr6:27482889-27483089	-0.354894	0.0012184	XXbac-BPGBPG34I8.1 (ENST00000603933) *Regulated	Processed pseudogene	Testis	NO
8144	chr6:43214370-43214591	-0.300139	0.014546	TTBK1 (MIM 619415)	Protein-coding	Brain	NO
8448	chr6:112688078-112688730	-0.414396	0.0121162	FEM1AP3 (ENST00000403722)	Processed pseudogene	Testis	NO
8781	chr6:169977219-169977894	-0.148166	0.0204558	WDR27	Protein-coding	Thyroid and others	NO
9255	chr7:23245557-23246161	-0.314904	0.0476045	AC005082.12 (ENST00000413042)	IncRNA	Testis, kidney and others	NO
9449	chr7:47092245-47093076	-0.394807	0.00050016	AC004870.3 (ENST00000455078)	IncRNA	Testis	NO
9458	chr7:48887510-48887818)	-0.283807	0.0297305	AC004899.1	Protein-coding	Brain	NO
				AC004899.3 (ENST00000424687)	Processed pseudogene	Testis	NO
9691	chr7:75779629-75780022	-0.332064	0.0255422	-	-	-	NO
11483	chr9:5303861-5304476	-0.290201	0.0197504	RLN2 (MIM 179740)	Protein-coding	Testis	NO
13042	chr10:51784595-51784810	-0.278029	0.0127364	RP11-324H6.5 (FAM21EP in hg38) (ENST00000417804) *Regulated	Processed pseudogene	Heart	NO
13355	chr10:102279163-102279730	-0.285453	0.0180991	SEC31B (MIM 610258)	Protein-coding	Brain	NO
14877	chr11:89597045-89597775	-0.211644	0.0304947	RP11-81M19.3 (ENST00000529293)	Unprocessed pseudogene	Skin	NO
14878	chr11:89598463-89598825	-0.398672	0.000129808	RP11-81M19.3 (ENST00000529293)	Unprocessed pseudogene	Skin	NO
14884	chr11:89786603-89786956	-0.280368	0.00335025	RP11-592A4.12 (NST00000530158)	Unprocessed pseudogene	Pituitary, testis, Brain	NO
				TRIM49C	Protein-coding	Testis	NO
14907	chr11:94770607-94771404	-0.415088	0.00335025	RP11-60C6.5 (ENST00000442518)	Processed pseudogene	Testis	NO
15210	chr12:2339163-2339615	-0.353531	0.0159435	CACNA1C (MIM 114205)	Protein-coding	Colon	Timothy syndrome (*AD, MIM 601005) Brugada syndrome 3 (Unknown, MIM 611875) Long QT syndrome 8 (Unknown, MIM 618447)
15752	chr12:64215500-64215990	-0.317958	0.0134522	PABPC1P4 (ENST00000539977)	Processed pseudogene	Esophagus and others	NO
				RXYLT-AS1 (ENST00000546214)	Antisense RNA	Testis	NO
17000	chr13:114964101-114965840	-0.278564	0.0304947	CFAP97D2 (new in hg38)	Protein-coding	Pancreas	NO
				RP11-569D9.6 (ENST00000637433)	IncRNA	Testis, pancreas	NO
17826	chr15:23454144-23455600	-0.274227	0.0292974	-	-	-	NO
18493	chr15:91473315-91473592	-0.0651987	0.0307341	HDDC3 *Regulated	Protein-coding	Lymphocytes and others	NO
				UNC45A (MIM 611219)	Protein-coding	Artery and others	Osteootohepatoenteric syndrome (*AR, MIM 619377)
18566	chr15:101389733-101390260	-0.258147	0.0206523	RP11-66B24.2 (ENST00000557962, ENST00000561231, ENST00000559331, ENST00000558254)	IncRNA	Prostate, cervix and others	NO
				RP11-66B24.7 (ENST00000431060)	IncRNA	No information	NO
19054	chr16:10912160-10912719	-0.271775	0.00542755	TVP23A	Protein-coding	Ovary, brain and others	NO
19453	chr16:49498890-49499405	-0.264726	0.0334152	-	-	-	NO
20506	chr17:20687570-20687913	-0.319556	0.0206523	SCDP1 *Regulated	Processed pseudogene	Brain	NO
20799	chr17:40191788-40192450	-0.272117	0.0304947	ZNF385C	Protein-coding	Testis, brain	NO
22067	chr18:74499317-74499641	-0.355102	0.0206523	-	-	-
23279	chr19:14376689-14376961	-0.254586	0.0476045	CTD-2189E23.1	IncRNA	Cervix, brain	NO
23720	chr19:36484905-36485476	-0.370735	0.0121162	SDHAF1 (MIM 612848) *Regulated	Protein-coding	Brain and others	Mitochondrial complex II deficiency, nuclear type 2 and Leigh syndrome (*AR, MIM 619166)
25162	chr20:43932913-43933400	-0.348286	0.0476045	MATN4 (MIM 603897)	Protein-coding	Brain and others	NO
25527	chr20:62569798-62570776	-0.252243	0.0134522	UCKL1 (MIM 610866) *Regulated	Protein-coding	Brain and others	NO
25653	chr21:35445088-35446013	-0.282437	0.0304947	MRPS6 (MIM 611973)	Protein-coding	Kidney	NO

## Sheet: KS1 without KMT2D_5(nIsland=4)
CpG site	Location	mean.meth.diff	adjusted_pvalue	Genes (transcript or OMIM ID)	Gene product	Highest gene expression (GTEx)	Associated inherited disorder?
3931	chr2:232348217-232348866	-0.268666	0.0462381	NCL (MIM 164035) *Regulated	Protein-coding	Lymphocytes and others	NO
21001	chr17:46685245-46685449	0.223405	0.0462381	HOXB7 (MIM 142962)	Protein-coding	Kidney	NO
21752	chr18:7011268-7011488	0.215999	0.0462381	LAMA1 (MIM 150320)	Protein-coding	Testis	Poretti-Boltshauser syndrome (*AR, MIM 615960)
24842	chr20: 3732062-3732944	0.242203	0.0462381	HSPA12B (MIM 610702)	Protein-coding	Adipose, Breast and others	NO
